# Supplementary material
Source: PubMed Central journal article supplement (PMC4175126)
Supplement: 10-1055-s-0034-1383065-sup_gf843.pdf [file 10-1055-s-0034-1383065-sup_gf843.pdf]

# „Schwanger und Operieren“: Auswertung einer deutschlandweiten Erhebung unter Frauenärztinnen und Chirurginnen

“Pregnant and Operating”: Evaluation of a Germany-wide Survey Among  
Female Gynaecologists and Surgeons

## Autoren

C. Knieper<sup>1</sup>, B. Ramsauer<sup>2</sup>, K. Hancke<sup>3</sup>, A. Woeckel<sup>4</sup>, L. Ismail<sup>1</sup>, A. Bühren<sup>5</sup>, B. Toth<sup>1</sup>

## Institute

<sup>1</sup> Gynäkologische Endokrinologie und Fertilitätsstörungen, Universitätsfrauenklinik Heidelberg, Heidelberg

<sup>2</sup> Vivantes Klinikum Neukölln, Berlin

<sup>3</sup> Klinik für Frauenheilkunde und Geburtshilfe der Universitätsklinik Ulm, Ulm

<sup>4</sup> Frauenklinik und Poliklinik Universitätsklinikum Würzburg, Würzburg

<sup>5</sup> Praxis für Psychosomatische Medizin und Psychotherapie, Murnau

## Schlüsselwörter

- Schwangerschaft
- Operieren
- Mutterschutz

## Key words

- pregnancy
- operating
- protection of expectant and nursing mothers

## Zusammenfassung

Das aktuelle Mutterschutzgesetz schließt eine operative Tätigkeit während der Schwangerschaft für in der Klinik operativ tätige Ärztinnen weitestgehend aus. Der Anteil der Berufseinsteigerinnen liegt in der Gynäkologie bei 80%, für viele dieser Frauen ist die operative Weiterbildung nach offizieller Mitteilung einer bestehenden Schwangerschaft nicht möglich. In einer deutschlandweiten Umfrage unter Gynäkologinnen und Chirurginnen wurde anhand eines Fragebogens u. a. ermittelt, inwieweit Ärztinnen in der Schwangerschaft operativ tätig waren, ob es zu Komplikationen in der Schwangerschaft kam, wann die Schwangerschaft dem Arbeitgeber mitgeteilt wurde und welche Änderungswünsche bez. des Mutterschutzgesetzes bestehen. Die Daten von 164 Ärztinnen, davon 136 Gynäkologinnen und 28 Chirurginnen, wurden ausgewertet. Die Schwangerschaft wurde im Mittel in der 14. Schwangerschaftswoche (SSW) bekanntgegeben, ein Ausschluss aus der operativen Tätigkeit erfolgte in der 21. SSW. Ärztinnen in höheren beruflichen Positionen gaben tendenziell später die Schwangerschaft bekannt und beendeten später die operative Tätigkeit. Es bestand kein Zusammenhang zwischen dem Zeitpunkt des Ausscheidens aus der operativen Tätigkeit und einem vermehrten Auftreten von Beschwerden oder Komplikationen während der Schwangerschaft. Insgesamt führten nur 53% der Befragten in der Schwangerschaft ein Personalgespräch und 75% wünschten sich eine Änderung des Mutterschutzgesetzes.

## Abstract

The current law on the protection of expectant and nursing mothers largely rules out surgical activities during pregnancy for female doctors who perform surgical roles in hospitals. The proportion of female junior staff in gynaecology amounts to 80%, and, for many of these women, surgical further training is not possible following official notification of an existing pregnancy. In a Germany-wide survey of female gynaecologists and surgeons using a questionnaire, it was determined to what extent female doctors worked in surgery during pregnancy, whether it led to complications in the pregnancy, when the employer was notified about the pregnancy, and what desire for change there is with regard to the law on the protection of expectant and nursing mothers. The data from 164 female doctors, of which 136 are gynaecologists and 28 surgeons, was evaluated. On average, the pregnancy was announced during the 14th week of pregnancy (WOP), and the doctor was not allowed to perform surgical activities in the 21st WOP. Female doctors in higher professional roles tended to announce the pregnancy later and ended their surgical activities later. There was no link between the time of ceasing surgical activities and an increased occurrence of complaints or complications during the pregnancy. In total, only 53% of respondents had an appraisal during pregnancy and 75% wanted a change in the law on the protection of expectant and nursing mothers.

eingereicht 22.7.2014

revidiert 21.8.2014

akzeptiert 21.8.2014

## Bibliografie

DOI <http://dx.doi.org/10.1055/s-0034-1383065>  
Geburtsh Frauenheilk 2014; 74:  
1–6 © Georg Thieme Verlag KG  
Stuttgart · New York ·  
ISSN 0016-5751

## Korrespondenzadresse

**Catherine Knieper**  
Universitätsfrauenklinik  
Heidelberg  
Gynäkologische Endokrinologie  
und Fertilitätsstörungen  
Im Neuenheimer Feld 440  
69120 Heidelberg  
[knieperc@googlemail.com](mailto:knieperc@googlemail.com)

## Einleitung

Das Mutterschutzgesetz (MuSchG) gründet auf dem Gesetz zum Schutz der erwerbstätigen Mutter vom 24. 1. 1952 und wurde seitdem mehrmals

überarbeitet, zuletzt im März 2009 (Artikel 14, BGBl. I, S.550). In seiner aktuellen Version schränkt es die Möglichkeiten der operativen Tätigkeit einer klinisch tätigen Frauenärztin und Chirurgin weitestgehend ein [1]. So dürfen nach

dem 5. Monat Schwangere nicht länger als 4 Stunden stehend beschäftigt werden, und es besteht ein Beschäftigungsverbot sowohl zwischen 20:00 und 6:00 Uhr als auch an Feiertagen. Der Umgang mit gesundheitsschädigenden Substanzen wie Narkosegasen oder Zytostatika bzw. Strahlen einschließlich Röntgenstrahlen ist untersagt. Sowohl das MuSchG als auch die Verordnung zum Schutze der Mütter am Arbeitsplatz (MuSchArbV) beziehen sich ausschließlich auf Frauen, die in einem Arbeitsverhältnis stehen. Es werden also weder Studentinnen noch niedergelassene Ärztinnen eingeschlossen. Das bedeutet wiederum auch, dass mit dem Mitteilen der Schwangerschaft die angestellte Ärztin nicht mehr operativ tätig werden darf, die niedergelassene aber schon.

Viele schwangere Ärztinnen werden nach Bekanntgabe ihrer Schwangerschaft vornehmlich mit organisatorischen und verwaltungsrelevanten Aufgaben anstelle von facharztrelevanten Eingriffen betraut [2]. Gerade durch den Ausschluss von Operationen kann sich so die Facharztausbildung verlängern bzw. fällt die betroffene Ärztin im klinikinternen Ranking gegenüber männlichen Kollegen oftmals zurück [3,4]. Das führt dazu, dass Schwangerschaften dem Arbeitgeber häufig erst spät gemeldet werden. Allerdings ist dies gerade im chirurgischen Umfeld kritisch zu sehen, da so möglicherweise keine institutionelle Unterstützung bei der Einhaltung von erforderlichen Sicherheitsmaßnahmen (z.B. Erhebung der relevanten Laborparameter vor einem operativen Eingriff, Nutzung stichsicherer Instrumente, Einsatz bei planbaren Eingriffen, OP-Dauer von maximal 4 Stunden, Befreiung vom Nachtdienst und kein hauptverantwortlicher Einsatz bei Notfällen) gewährleistet ist [5,6]. Deshalb ist eine Aktualisierung der Mutterschutzgesetzgebung anzustreben, damit schwangere Ärztinnen auch mit Unterstützung des betriebsärztlichen Dienstes und der Klinikleitung von ihnen gewünschte operative Leistungen unter größtmöglichen Sicherheitsstandards erbringen können.

Auf der anderen Seite gibt es Ärztinnen mit (Risiko-)Schwangerschaften, welche keine operative Tätigkeit wünschen und daher Angst vor einer Änderung des MuSchG haben. Diese müssen selbstverständlich von potenziell riskanten oder ihrer aktuellen Situation in der Schwangerschaft entgegenstehenden Tätigkeiten entbunden werden [7].

Im Rahmen unserer deutschlandweiten Studie wurden Gynäkologinnen und Chirurgen zu ihren Erfahrungen bez. einer operativen Tätigkeit während der Schwangerschaft, geburtshilflichen Komplikationen, dem Zeitpunkt der Bekanntgabe der Schwangerschaft sowie Änderungswünschen bez. des MuSchG befragt.

## Material und Methoden

### Datenerhebung und Fragebogen

Dr. Astrid Bühren und Prof. Dr. Bettina Toth, Mitglieder der ehemaligen Kommission „Karriere und Familie“ der Deutschen Gesellschaft für Gynäkologie und Geburtshilfe (DGGG) entwarfen 2011 den Fragebogen „Schwanger und operieren“ und veröffentlichten ihn zunächst in der Chirurgischen Allgemeinen Zeitung [1]. Anschließend wurde der Fragebogen an die Mitglieder der DGGG online und auf Kongressen verteilt (z.B. DAGG Kongress Berlin 2011, Kongress für Perinatalmedizin Berlin 2012, DGGG Kongress München 2012).

Es wurden folgende Daten erhoben: das aktuelle Alter, die Partnerschaft, die derzeitige berufliche Position und jene während

der (jeweiligen) Schwangerschaft, der Zeitpunkt der Bekanntgabe der Schwangerschaft an den Vorgesetzten und der Zeitpunkt des Ausscheidens aus der operativen Tätigkeit, die Motivation für die operative Tätigkeit, die Anzahl der Stunden im OP, körperliche Beschwerden während der operativen Tätigkeit und Komplikationen in der Schwangerschaft, der Zeitpunkt der Entbindung und der Wiedereinstieg in den Beruf. Darüber hinaus wurde im Falle einer Frühgeburt erfragt, ob ein kausaler Zusammenhang zur operativen Tätigkeit bestand. Es wurde erfasst, ob die Befragten erneut in der Schwangerschaft operativ tätig sein würden, ob ein Personalgespräch geführt wurde und welche Änderungswünsche am MuSchG bestanden.

## Statistische Analyse

Die statistische Auswertung wurde unter Verwendung der Statistiksoftware R und des Review Managers, Version 5.1 (Copenhagen, The Nordic Cochrane Centre, The Cochrane Collaboration, 2011) durchgeführt.

Im Rahmen einer explorativen Datenanalyse wurden Boxplots und Balkendiagramme erstellt. Eine Mittelwertanalyse erfolgte durch einen Zweistichproben-t-Test sowie einer einfaktoriellen Varianzanalyse (ANOVA). Zur Analyse von Zusammenhängen wurde in Abhängigkeit des vorliegenden Skalenniveaus ein Chi-Quadrat-Test, Bravais-Pearson- bzw. Kendalls-Tau-Korrelationskoeffizient und das relative Risiko berechnet. Als Signifikanzniveau wurde ein p-Wert von  $<0,05$  festgelegt. Lag ein p-Wert von  $<0,1$  vor, wurde dies als Hinweis auf einen Zusammenhang bzw. schwache Signifikanz gedeutet. Die Daten werden im Folgenden als Mittelwert  $\pm$  Standardabweichung (Minimum – Maximum) angegeben.

## Ergebnisse

### Studienpopulation

An der Studie beteiligten sich 164 Ärztinnen, davon 136 operativ tätige Gynäkologinnen und 28 Chirurgen. Der Großteil (73,2%) war jünger als 45 Jahre, 26,8% waren älter als 45 Jahre (Abb. 1).

Zum Zeitpunkt der Datenerhebung befanden sich 49 Befragte in der Facharztweiterbildung, 73 praktizierten als Fachärztinnen, 28 als Oberärztinnen, 7 als leitende Oberärztinnen, 6 als Chefärztinnen.

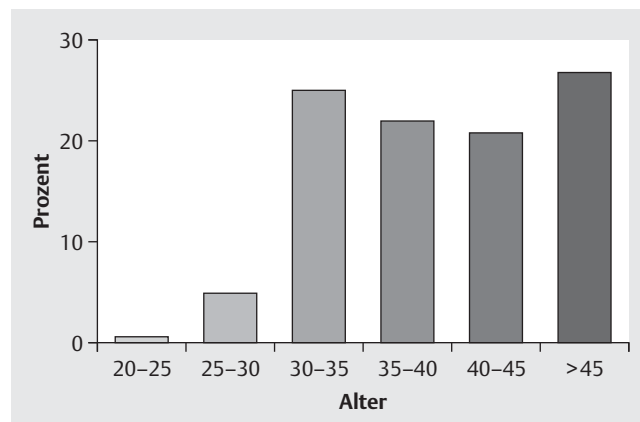

Abb. 1 Prozentuale Altersverteilung nach Altersgruppen, n = 161.

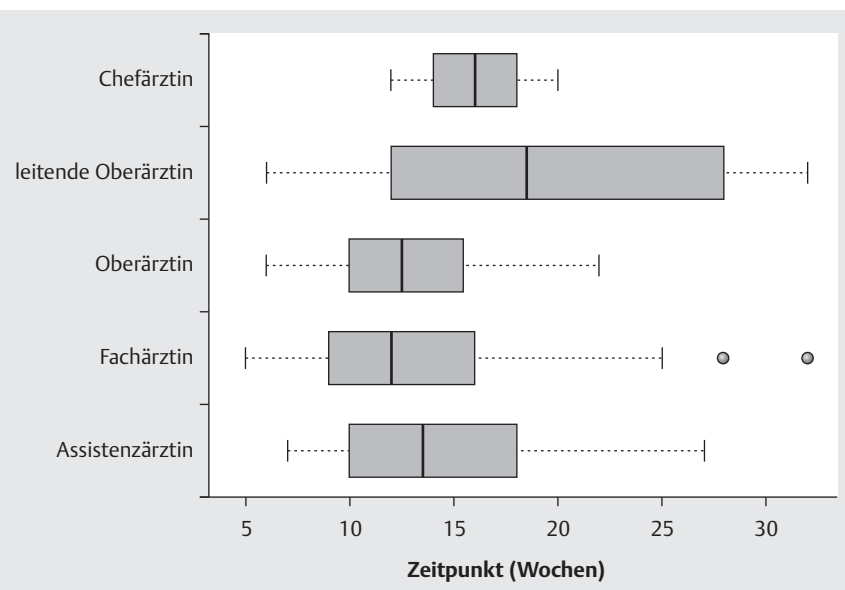

**Abb. 2** Boxplot-Darstellung: Es zeigt sich, dass leitende Oberärztinnen ihre Schwangerschaft später bekanntgaben, ohne dass eine Signifikanz erreicht wurde.

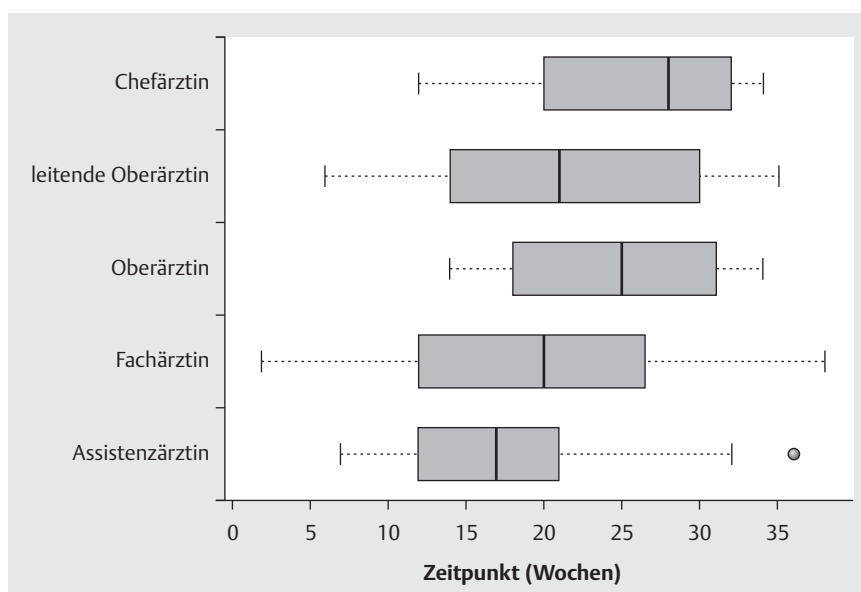

**Abb. 3** Boxplot-Darstellung: Oberärztinnen schieden im Vergleich zu Assistenzärztinnen signifikant später aus der operativen Tätigkeit aus.

Der Großteil (82%) war verheiratet, 3% befanden sich in einer Beziehung, 11% lebten getrennt von ihrem Partner, 2% waren geschieden und 2% alleinerziehend.

Die Befragten hatten im Mittel  $2,05 \pm 1,0$  Kinder (1–7).

### Operieren und Schwangerschaft

Die Schwangerschaft wurde im Mittel in der 14. SSW ( $13,8 \pm 5,5$  [5–32]) bekanntgegeben. Leitende Oberärztinnen informierten ihren Arbeitgeber tendenziell 5 Wochen später als Assistenzärztinnen (19,2 SSW im Vergleich zur 14,0 SSW). Eine ANOVA-Analyse ergab keine Signifikanz beim Vergleich aller Berufsgruppen (● **Abb. 2**), und auch ein Vergleich der jüngeren (< 45 Jahre) und älteren Befragten (> 45 Jahre), zeigte keinen signifikanten Unterschied beim Zeitpunkt der Bekanntgabe der Schwangerschaft. Das Ausscheiden aus der operativen Tätigkeit erfolgte im Mittel in der 21. SSW ( $20,6 \pm 8,7$  [2–38] SSW). Es zeigte sich ein Trend zu einem späteren Ausscheiden aus der operativen Tätigkeit in höheren beruflichen Positionen. Im direkten Vergleich zwischen

Assistenzärztinnen und Oberärztinnen zeigte sich ein signifikant späteres Ausscheiden der Oberärztinnen (18,4 vs. 24,7 SSW,  $p = 0,008$ ) (● **Abb. 3**). Ebenso stiegen jüngere Befragte (< 45 Jahre) signifikant früher aus der operativen Tätigkeit aus (19,4 vs. 24,7 SSW,  $p = 0,005$ ).

Die Anzahl der Stunden im OP pro Tag betrug im 1. Trimenon im Mittel  $4,0 \pm 2,8$  h, im 2. Trimenon  $2,9 \pm 3,1$  h und im 3. Trimenon  $1,1 \pm 2,7$  h. Befragte mit höheren Stundenzahlen im OP schieden später aus der operativen Tätigkeit aus mit einem Korrelationskoeffizienten ( $r$ ) von 0,22 ( $p = 0,03$ ) und bekamen signifikant früher ihr Kind ( $r = -0,21$ ,  $p = 0,03$ ).

### Komplikationen und Beschwerden

Insgesamt 7,1% der Befragten hatten eine Frühgeburt, 2% (3/114) sahen diese als Konsequenz der operativen Tätigkeit.

Eine Korrelationsanalyse ergab keinen statistischen Zusammenhang zwischen der Anzahl der Stunden im OP und Beschwerden während der Schwangerschaft wie Beckenschmerzen, ver-

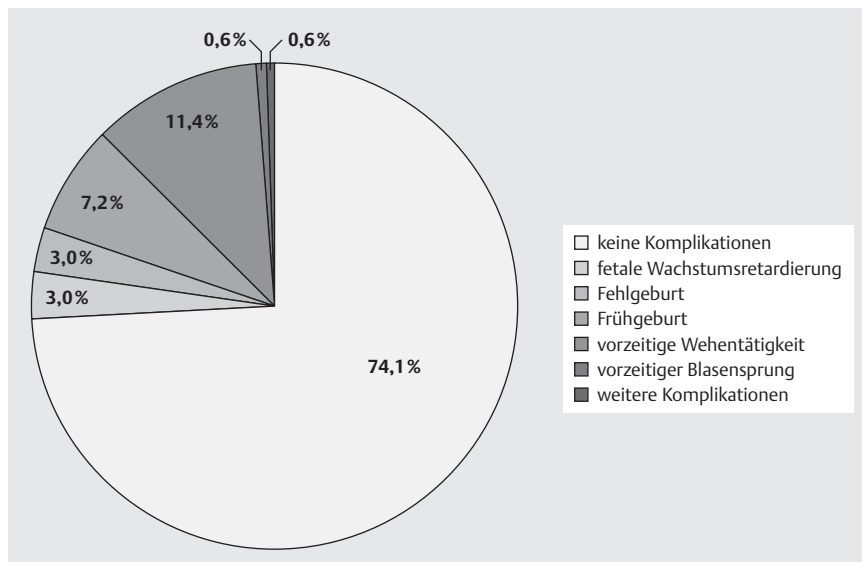

**Abb. 4** Komplikationen, die während der ersten Schwangerschaft angegeben wurden.

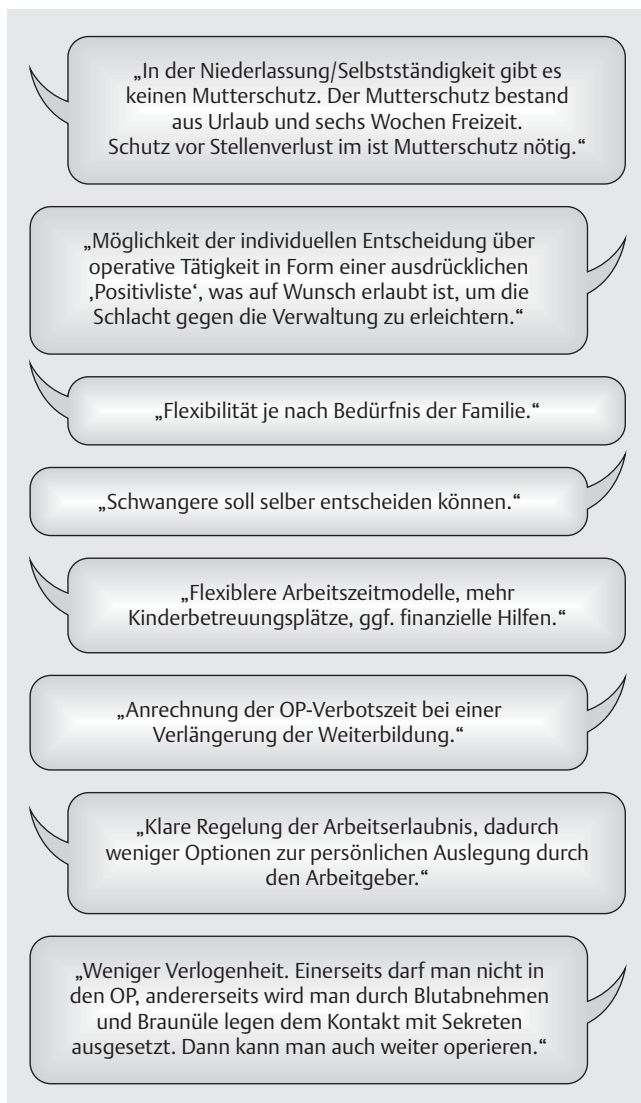

**Abb. 5** Konkrete Änderungswünsche des MuSchG, die in Form von Randnotizen auf den Bögen eingetragen wurden.

mehrtem Unwohlsein, vaginalen Blutungen oder vorzeitigem Wehen.

In der 1. Schwangerschaft gaben 74,4% keine Komplikationen an, 2,9% nannten eine fetale Wachstumsretardierung, 2,9% eine Fehlgeburt, 7,1% eine Frühgeburt, 0,6% einen frühzeitigen Blasensprung und 0,6% weitere Komplikationen (● **Abb. 4**).

Es bestand keine Korrelation zwischen dem Zeitpunkt des Ausscheidens aus der operativen Tätigkeit und dem Auftreten von Komplikationen. Ebenso zeigte sich kein signifikanter Zusammenhang zwischen der beruflichen Position und dem Auftreten von Komplikationen.

### Motivation und Änderungswünsche

Als Motivation für die operative Tätigkeit wurde mehrheitlich (88%) der eigene Wunsch, in 8% „aufgrund des Vorgesetzten“ und in 4% „aufgrund der KollegInnen“ angegeben.

Nach der 1. Schwangerschaft erfolgte der Wiedereinstieg in den Beruf im Mittel nach  $10,2 \pm 7,0$  Monaten. 78% gaben an, nach der Schwangerschaft wieder operieren zu wollen, 22% lehnten dies ab.

Nur in 53% der Fälle wurde ein Personalgespräch im Rahmen der Schwangerschaft geführt.

75% der Befragten gaben an, Änderungswünsche am MuSchG zu haben. Operativ tätige Schwangere wünschten sich signifikant eher eine Änderung des MuSchG ( $p=0,008$ ). Insgesamt 80% wünschten sich die Möglichkeit der individuellen Entscheidung über eine weitere operative Tätigkeit, 53% ein etabliertes Gespräch über Schwangerschaft und Elternzeit gemäß dem Heidelberger Schwangerschafts- und Elternzeitprogramm (HeiSEP) und 49% eine Anerkennung des Mutterschutzes für die Weiterbildung (● **Abb. 5**).

### Diskussion

In der vorliegenden deutschlandweiten Umfrage unter Gynäkologinnen und Chirurgen konnte gezeigt werden, dass die Mehrzahl der operativ tätigen Ärztinnen auf eigenen Wunsch über die 14. SSW hinaus einer operativen Tätigkeit nachgehen will, obwohl dies aufgrund des aktuellen MuSchG nicht möglich ist.

Insgesamt wurden Fragebögen von 164 Gynäkologinnen und Chirurginnen ausgewertet. Die Befragten hatten im Mittel 2,05 Kinder. Das entspricht in etwa dem Durchschnitt in Deutschland von 2,1 Kindern bei Familien mit Kindern (Stand 2010) [8]. Betrachtet man die Gesamtheit der Frauen in Deutschland (Frauen mit und ohne Kinder), betrug 2010 die durchschnittliche Kinderzahl je Frau 1,4–1,5 [8]. Gleichzeitig waren 2010 33% aller Ärztinnen und Apothekerinnen kinderlos im Vergleich zu 24% der Frauen aller Berufsgruppen.

In Deutschland sind Frauen bei der Geburt ihres 1. Kindes durchschnittlich 29,2 Jahre alt, und es besteht die höchste Geburtenhäufigkeit im Alter zwischen 30–34 Jahren. Genau in diesen Zeitraum fällt die Facharztweiterbildung und damit die beruflich intensivste Zeit, insbesondere bei einem operativen Fachgebiet [9]. Das Alter zum Zeitpunkt der Entbindung wurde durch den Fragebogen nicht erfasst, lediglich das Alter zum Zeitpunkt der Befragung, wobei 75% der antwortenden Frauen <45 Jahre waren. In einer amerikanischen Studie unter 100 Chirurginnen zeigte sich, dass eine Schwangerschaft bei Ausübung eines operativen Fachgebiets oft aufgeschoben oder sogar komplett negiert wurde. Chirurginnen mit Kindern gaben an, dass „Kinder und Familie“ ihre Karriere eher behindert hätten [10]. So erhielten Frauen ohne Kind 95% des Gehalts ihrer männlichen Kollegen, Frauen mit Kindern dagegen nur 75% [10]. Da aufgrund des Fokus auf „schwanger und operieren“ in unserer Studie nur Frauen mit Kindern geantwortet haben, ist hier kein Vergleich zu kinderlosen operativ tätigen Gynäkologinnen oder Chirurginnen möglich.

Die Schwangerschaft wurde im Mittel in der 14. SSW mitgeteilt, und in der 21. SSW erfolgte der Ausstieg aus der operativen Tätigkeit. Durchschnittlich konnten die Befragten also 7 Wochen nach Bekanntgabe der Schwangerschaft weiter operieren. Jüngere Befragte (<45 Jahre) stiegen jedoch signifikant früher aus der operativen Tätigkeit aus (19 vs. 25 SSW). Es ist also denkbar, dass die im Mittelwert deutlich lange Operationsdauer (bis 21 SSW) durch die älteren Befragten bedingt ist. Für detailliertere Analysen der jeweiligen Untergruppen in Bezug auf Alter oder Ausbildungsstatus ist die Stichprobe allerdings zu klein.

Leitende Oberärztinnen informierten ihren Arbeitgeber später über die Schwangerschaft als Assistenzärztinnen. Dementsprechend beendeten Frauen in höheren Positionen auch tendenziell später ihre operative Tätigkeit. Es bestand jedoch kein signifikanter Zusammenhang zwischen der beruflichen Position und dem Eintreten von Komplikationen während der Schwangerschaft.

Es zeigte sich eine Korrelation zwischen der Anzahl der wöchentlichen Stunden im OP und dem Zeitpunkt des Ausscheidens aus der operativen Tätigkeit. Frauen, die häufig operierten, verfolgten diese Tätigkeit wie erwartet auch insgesamt länger.

Andersherum bestand eine negative Korrelation zwischen der Anzahl der Stunden im OP und dem Geburtszeitpunkt. Frauen, die lange operierten, brachten ihre Kinder tendenziell früher zur Welt, jedoch gaben lediglich 2% (3/114) einen Zusammenhang zwischen dem Auftreten einer Frühgeburt und der operativen Tätigkeit an. Es bestand jedoch kein statistischer Zusammenhang zwischen der Anzahl der Stunden im OP und dem Auftreten von Beschwerden und Komplikationen. Unseres Wissens gibt es bisher keine Studien zum Auftreten von Komplikationen einschließlich Frühgeburtslichkeit bei operativ tätigen Ärztinnen. Vergleicht man die genannten Komplikationen mit dem Normalkollektiv, fällt auf, dass die Inzidenz eher niedrig ausfällt. Gemäß der aktuellen Literatur beträgt das durchschnittliche Risiko für fetale Wachstumsretardierung 8,9% [11], für eine Fehlgeburt 12–31%

#### Checkliste für Mitarbeitergespräch

- ☐ Schwangerschaftsalter
- ☐ errechneter Termin
- ☐ Beginn des Mutterschutzes
- ☐ Resturlaub
- ☐ Überstunden
- ☐ voraussichtlicher Beginn der Abwesenheit
- ☐ Erklärung der Mutterschutzbestimmungen
- ☐ Angebot der Darlegung der persönlichen Risikosituation der Schwangeren
- ☐ Aufklärung über berufsspezifische Risiken und Expositionen (Vermeidung von langem Stehen, besondere Gefahr für Infektionen mit Hepatitis B/C, HIV, CMV, Parvovirus B19 usw.)
- ☐ Aktualisierung des Logbuchs
- ☐ Ausarbeitung eines individuellen beruflichen Curriculums für die Schwangerschaft
- ☐ Erstellung eines 5-Jahres-Planes bzw. Darstellung/Erörterung des individuellen Karriereplans
- ☐ Darstellung von individuellen Risiken im Rahmen der Schwangerschaft

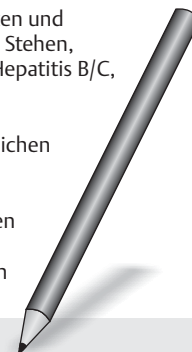

**Abb. 6** Checkliste, die mit dem Vorgesetzten im Rahmen von 3 Personalgesprächen besprochen wird [16].

[12], für eine Frühgeburt 5–7% [13] und für das Auftreten eines frühzeitigen Blasensprungs 2,9–3,5% [14].

Der Großteil der Befragten (75%) wünschte sich eine Änderung des MuSchG, insbesondere die operativ tätigen Schwangeren. Es besteht offenbar eine klare Motivation, trotz der Schwangerschaft weiter operativ tätig zu sein, da diese Entscheidung in 88% der Fälle von den Frauen selbst ausging. Hier gilt es jedoch zu bedenken, dass es sich bei den Frauen, die den Fragebogen ausgefüllt haben, möglicherweise um ein engagiertes, selektiertes Klientel handelt und aufgrund der insgesamt geringen Anzahl an antwortenden Gynäkologinnen und Chirurginnen kein endgültiger Rückschluss auf die Allgemeinheit der operativ tätigen Ärztinnen getroffen werden kann.

Insgesamt 78% der Befragten stiegen nach der Schwangerschaft wieder in die operative Tätigkeit ein. Unseres Wissens gibt es bisher keine Studien zu der Häufigkeit einer Wiederaufnahme der operativen Tätigkeit nach Schwangerschaft. Es wurde jedoch bereits beschrieben, dass weibliche Chirurginnen doppelt so oft wie männliche Kollegen die universitäre Laufbahn abbrechen, um sich um die Erziehung ihrer Kinder zu kümmern [15].

Nur knapp die Hälfte der Befragten (53%) führte ein Personalgespräch in der Schwangerschaft, obwohl die Mehrheit (53%) sich ausdrücklich ein solches Gespräch wünschte. Hier findet sich ein klarer Ansatzpunkt für Verbesserungen in der konkreten und individuellen Umsetzung des MuSchG. Ein Beispiel bietet das HeiSEP (Abb. 6). Im Rahmen von 3 Personalgesprächen werden die Rechte und Möglichkeiten der Schwangeren im Bezug auf folgende Punkte festgelegt: die Einbindung in die Klinik, die Fortführung und Weiterentwicklung der wissenschaftlichen Tätigkeit, die Gestaltung der Lehre, die fachliche Weiterbildung und die Wiedereingliederung nach Elternzeit bzw. Mutterschutz [16]. So soll einerseits die Tätigkeit während der Schwangerschaft und nach dem Mutterschutz geregelt und andererseits die Angst vor

der Bekanntgabe einer Schwangerschaft und damit einhergehende potenzielle Gefährdungen genommen werden.

Ein Lösungsansatz, der in anderen Fachbereichen gewählt wird, ist bspw. die Anfertigung einer „Positivliste“, in der mögliche Tätigkeiten während der Schwangerschaft festgelegt werden. Der Berufsverband deutscher Anästhesisten (bda) veröffentlichte eine solche Liste für mögliche Einsatzgebiete von schwangeren Anästhesistinnen und Intensivmedizinerinnen [17]. Das Junge Forum der Deutschen Gesellschaft für Orthopädie und Unfallchirurgie (DGOU) plant die Veröffentlichung eines Positionspapiers bis 2015 mit Handlungsempfehlungen und einem Überblick über die Rechts- und Datenlage [18]. Für schwangere Gynäkologinnen wäre neben kürzeren Operationen bspw. eine Rotation in die Sonografie mit Verbesserung der DEGUM-Klassifikation ein denkbarer Einsatzbereich.

Entscheidend ist sicherlich auch eine Förderung im Anschluss an den Mutterschutz. Hier sollten Mütter die Möglichkeit bekommen, während der Schwangerschaft „vernachlässigte“ Tätigkeiten nachholen zu können. Hierzu zählt explizit auch die operative Tätigkeit. Vor dem Hintergrund einer zunehmenden Feminisierung des Fachbereichs der Gynäkologie mit einem weiblichen Anteil an Berufseinsteigern von 84,2% laut einer aktuellen Umfrage [19], ist es nötig, dass auch Frauen mit Kindern die Möglichkeit haben, eine Karriere in der Klinik weiter zu verfolgen. Nur so kann langfristig eine Aufrechterhaltung der Versorgungsstrukturen gewährleistet werden [20].

Zusammenfassend zeigte sich, dass insbesondere operativ tätige Frauen sich eine Aktualisierung des MuSchG wünschen. Dies sollte auf dem Boden veränderter Sicherheitsstandards, wissenschaftlicher Erkenntnisse und der Anpassung an andere Gesetze wie z.B. des Allgemeinen Gleichbehandlungsgesetzes (AGG) geschehen. Die Entscheidung zur operativen Tätigkeit während der Schwangerschaft wurde durch die Frauen selbst getroffen und führte nicht zu vermehrten geburtshilflichen Komplikationen.

Da es auf der anderen Seite auch Kolleginnen gibt, die vor einer Lockerung des MuSchG Sorge haben und eine Vereinnahmung durch KollegInnen bzw. Vorgesetzte fürchten, ist es von zentraler Bedeutung, dass eine individuelle Interpretation des MuSchG möglich ist, sodass Schwangere weiterhin geschützt sind, aber nicht in ihrem freiwilligen Wunsch nach einer operativen Tätigkeit bzw. beruflichen Entfaltung eingeschränkt werden.

## Interessenkonflikt

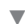

Nein.

## Literatur

- 1 Bühren A. Mutterschutz Ja – Berufsverbot Nein. Chirug BDC 2010; 10: 533–536
- 2 Turner PL, Lumpkins K et al. Pregnancy among women surgeons. Arch Surg 2012; 147: 474–479
- 3 Hancke K, Igl W, Toth B. Work-life balance of German gynecologists: a web-based survey on satisfaction with work and private life. Arch Gynecol Obstet 2014; 289: 123–129
- 4 Hancke K, Toth B, Igl W et al. Career and family – Are they compatible? Geburtsh Frauenheilk 2012; 72: 403–407
- 5 Enders G. Infektionsgefährdung: Mutterschutz im Krankenhaus. Arbeitsmed Sozialmed Umweltmed 2003; 38: 324–335
- 6 Wicker S, Rabenau HF, Haberl AE et al. Blutübertragbare Infektionen und die schwangere Mitarbeiterin im Gesundheitswesen. Der Chirurg 2012; 83: 136–142
- 7 Struck J. Mutterschutzregelungen in Deutschland. XX 2012; 1: 80–85
- 8 Statistisches Bundesamt. Geburten in Deutschland. 2012. Online: [https://http://www.destatis.de/DE/Publikationen/Thematisch/Bevoelkerung/Bevoelkerungsbewegung/BroschuereGeburtenDeutschland0120007129004.pdf?\\_\\_blob=publicationFile](https://http://www.destatis.de/DE/Publikationen/Thematisch/Bevoelkerung/Bevoelkerungsbewegung/BroschuereGeburtenDeutschland0120007129004.pdf?__blob=publicationFile); Stand: 2014
- 9 Cydulka RK, D'Onofrio G, Schneider S et al. Women in academic emergency medicine. Acad Emerg Med 2000; 7: 999–1007
- 10 Mayer KL, Ho HS, Goodnight JE jr. Childbearing and child care in surgery. Arch Surg 2001; 136: 649–655
- 11 Gaudineau A. [Prevalence, risk factors, maternal and fetal morbidity and mortality of intrauterine growth restriction and small-for-gestational age]. J Gynecol Obstet Biol Reprod (Paris) 2013; 42: 895–910
- 12 Thomas VV, Knight R, Haswell SJ et al. Maternal hair selenium levels as a possible long-term nutritional indicator of recurrent pregnancy loss. BMC Womens Health 2013; 13: 40
- 13 Beck S, Wojdyla D, Say L et al. The worldwide incidence of preterm birth: a systematic review of maternal mortality and morbidity. Bull World Health Org 2010; 88: 31–38
- 14 Chmaj-Wierzchowska K, Pięta B, Buks J et al. Determinants of favourable neonatal outcome after premature rupture of membranes (PROM) before 24 weeks of pregnancy–review of the literature and a case report. Ann Agric Environ Med 2012; 19: 577–580
- 15 Schroen AT, Brownstein MR, Sheldon GF. Women in academic general surgery. Acad Med 2004; 79: 310–318
- 16 Toth B, Schütz F, Sohn C. Das Heidelberger Schwangerschafts- und Elternzeitprogramm (HeiSep). Frauenarzt 2011; 52: 849–851
- 17 Hagemann H, Bühren A, Weis E et al. Mutterschutz in Anästhesiologie und Intensivmedizin. Anästhesiologie und Intensivmedizin 2014; 3: 133–142
- 18 Niethard H. Positionspapier Operieren in der Schwangerschaft. 25.06.2014 16.08.2014. Online: <http://www.jf-ou.de/?p=618>; Stand: 2014
- 19 Riepen T, Möbus V, Kullmer U et al. Male and female physicians in hospital gynaecology departments – analysis of the impact of “Feminisation” from the viewpoint of medical directors. Geburtsh Frauenheilk 2013; 73: 53–58
- 20 Scheele F, Novak Z, Vetter K et al. Obstetrics and gynaecology training in Europe needs a next step. Eur J Obstet Gynecol Reprod Biol 2014; DOI: 10.1016/j.ejogrb.2014.04.014
